# Supplementary material for: Systems-Pharmacology-Based Identification of Antitumor Necrosis Factor Effect in Mimeng Flower Decoction for the Treatment of Diabetic Retinopathy
Source: Evid Based Complement Alternat Med. 2019 Nov 19;2019:5107103. doi: 10.1155/2019/5107103 (PMC6885793; doi:10.1155/2019/5107103)
Supplement: Supplementary Materials — Table S1: Mimeng flower decoction comprising of seven herbs. Table S2: the active compounds in Mimeng flower decoction and their target genes. [file 5107103.f1.xlsx]

## Sheet: Table S1
Table S1. The seven herbs comprising of Mimeng flower decoction.
Herbs	Latin name	Abbreviation	Num of total components	OB≥30%	DL≥0.18	OB≥30% and DL≥0.18
Mimenghua	Buddlejae Flos	BF	46	8	31	4
Huanglian	Coptidis Rhizoma	CR	48	26	31	14
Rougui	Cinnanmomi Cortex	CC	100	50	0	0
Huangqi	Hedysarum Multijugum Maxim.	HMM	87	44	47	20
Nvzhenzi	Fructus Ligustri Lucidi	FLL	119	37	80	13
Wumei	Mume Fructus	MF	40	27	19	8
Yimucao	Leonuri Herba	LH	51	18	29	8

## Sheet: Table S2
Table S2. The active compounds in Mimeng flower decoction and their target genes.
Active compounds in Mimeng flower decoction	Target gene
Bifendate	PTGS2
Bifendate	HSP90AA1
Bifendate	KCNMA1
Bifendate	TOP2A
(3S,8S,9S,10R,13R,14S,17R)-10,13-dimethyl-17-[(2R,5S)-5-propan-2-yloctan-2-yl]-2,3,4,7,8,9,11,12,14,15,16,17-dodecahydro-1H-cyclopenta[a]phenanthren-3-ol	PGR
9,10-dimethoxypterocarpan-3-O-β-D-glucoside	PTGS2
9,10-dimethoxypterocarpan-3-O-β-D-glucoside	TOP2A
9,10-dimethoxypterocarpan-3-O-β-D-glucoside	NCOA1
hederagenin	PGR
hederagenin	NCOA1
hederagenin	ADH1B
hederagenin	ADH1C
hederagenin	PTGS2
hederagenin	SCN5A
1,7-Dihydroxy-3,9-dimethoxy pterocarpene	PTGS2
1,7-Dihydroxy-3,9-dimethoxy pterocarpene	HSP90AA1
kaempferol	PTGS2
kaempferol	AR
kaempferol	PPARG
kaempferol	HSP90AA1
kaempferol	PIK3CA
kaempferol	PRKACA
kaempferol	NCOA1
kaempferol	DPP4
kaempferol	PGR
kaempferol	NOS3
kaempferol	ACHE
kaempferol	TOP2A
kaempferol	F7
kaempferol	RELA
kaempferol	IKBKB
kaempferol	AKT1
kaempferol	BCL2
kaempferol	BAX
kaempferol	TNF
kaempferol	MAPK8
kaempferol	MMP1
kaempferol	STAT1
kaempferol	CDK1
kaempferol	HMOX1
kaempferol	CYP2C9
kaempferol	ICAM1
kaempferol	VCAM1
kaempferol	ALOX5
kaempferol	HAS2
kaempferol	PSMD3
kaempferol	IRS1
kaempferol	PPP3CA
kaempferol	GSTM1
kaempferol	AKR1C3
kaempferol	SLPI
quercetin	PTGS2
quercetin	AR
quercetin	PPARG
quercetin	HSP90AA1
quercetin	PIK3CA
quercetin	NCOA1
quercetin	DPP4
quercetin	AKR1B1
quercetin	TOP2A
quercetin	KCNH2
quercetin	SCN5A
quercetin	MMP3
quercetin	PRKACA
quercetin	F7
quercetin	NOS3
quercetin	ACHE
quercetin	RELA
quercetin	EGFR
quercetin	AKT1
quercetin	TNF
quercetin	CCND1
quercetin	BCL2
quercetin	MCL1
quercetin	CDKN1A
quercetin	EIF3E
quercetin	BAX
quercetin	PLAUR
quercetin	MMP9
quercetin	RBL2
quercetin	IL6R
quercetin	ELK1
quercetin	BRAF
quercetin	SOD1
quercetin	COL1A2
quercetin	MMP1
quercetin	HIF1A
quercetin	STAT1
quercetin	HERC5
quercetin	CDK1
quercetin	HSPA5
quercetin	ERBB2
quercetin	PRKAA1
quercetin	HMOX1
quercetin	CYP2C9
quercetin	MYC
quercetin	F3
quercetin	GJA1
quercetin	ICAM1
quercetin	VCAM1
quercetin	TGFBR2
quercetin	BIRC5
quercetin	DUOX2
quercetin	TGFB1
quercetin	THBD
quercetin	IFNG
quercetin	ALOX5
quercetin	PTEN
quercetin	IL1A
quercetin	MPO
quercetin	CXCL8
quercetin	ABCG2
quercetin	HAS2
quercetin	NFE2L2
quercetin	NQO1
quercetin	PSMD3
quercetin	COL3A1
quercetin	CXCL12
quercetin	CXCR2
quercetin	DDB1
quercetin	CHEK2
quercetin	IRS1
quercetin	PPARGC1A
quercetin	HSF1
quercetin	CRP
quercetin	CHUK
quercetin	SPP1
quercetin	NLRP3
quercetin	E2F1
quercetin	ACPP
quercetin	CTSD
quercetin	IGFBP3
quercetin	IGF2R
quercetin	CD40LG
quercetin	ERBB3
quercetin	PON1
quercetin	PCOLCE
quercetin	NPEPPS
quercetin	GSTM1
Calycosin	PTGS2
Calycosin	ESR1
Calycosin	AR
Calycosin	PPARG
Calycosin	DPP4
Calycosin	GSK3B
Calycosin	HSP90AA1
Calycosin	CDK1
Calycosin	PRKACA
Calycosin	PIM1
Calycosin	NCOA1
isomucronulatol-7,2'-di-O-glucosiole	TOP2A
isorhamnetin	PTGS2
isorhamnetin	ESR1
isorhamnetin	AR
isorhamnetin	PPARG
isorhamnetin	PTPN22
isorhamnetin	DPP4
isorhamnetin	GSK3B
isorhamnetin	HSP90AA1
isorhamnetin	CDK1
isorhamnetin	PIK3CA
isorhamnetin	PRKACA
isorhamnetin	PIM1
isorhamnetin	NCOA1
isorhamnetin	AKR1B1
isorhamnetin	F7
isorhamnetin	NOS3
isorhamnetin	ACHE
isorhamnetin	RELA
isorhamnetin	CXCL8
isorhamnetin	OLR1
Jaranol	PTGS2
Jaranol	AR
Jaranol	SCN5A
Jaranol	ESR1
Jaranol	DPP4
Jaranol	HSP90AA1
Jaranol	CDK1
Jaranol	NCOA1
3,9-di-O-methylnissolin	PTGS2
3,9-di-O-methylnissolin	ESR1
3,9-di-O-methylnissolin	SCN5A
3,9-di-O-methylnissolin	NOS3
3,9-di-O-methylnissolin	HTR3A
3,9-di-O-methylnissolin	ACHE
3,9-di-O-methylnissolin	NCOA1
Mairin	PGR
(6aR,11aR)-9,10-dimethoxy-6a,11a-dihydro-6H-benzofurano[3,2-c]chromen-3-ol	PTGS2
(6aR,11aR)-9,10-dimethoxy-6a,11a-dihydro-6H-benzofurano[3,2-c]chromen-3-ol	ESR1
(6aR,11aR)-9,10-dimethoxy-6a,11a-dihydro-6H-benzofurano[3,2-c]chromen-3-ol	SCN5A
(6aR,11aR)-9,10-dimethoxy-6a,11a-dihydro-6H-benzofurano[3,2-c]chromen-3-ol	HTR3A
(6aR,11aR)-9,10-dimethoxy-6a,11a-dihydro-6H-benzofurano[3,2-c]chromen-3-ol	ACHE
(6aR,11aR)-9,10-dimethoxy-6a,11a-dihydro-6H-benzofurano[3,2-c]chromen-3-ol	HSP90AA1
(6aR,11aR)-9,10-dimethoxy-6a,11a-dihydro-6H-benzofurano[3,2-c]chromen-3-ol	CHRNA7
(6aR,11aR)-9,10-dimethoxy-6a,11a-dihydro-6H-benzofurano[3,2-c]chromen-3-ol	NCOA1
FA	CDK1
FA	GSK3B
formononetin	PTGS2
formononetin	ESR1
formononetin	AR
formononetin	PPARG
formononetin	SLC6A3
formononetin	DPP4
formononetin	GSK3B
formononetin	HSP90AA1
formononetin	CDK1
formononetin	PRKACA
formononetin	PIM1
formononetin	PKIA
formononetin	NOS3
formononetin	ACHE
formononetin	IL4R
formononetin	NDUFB6
7-O-methylisomucronulatol	PTGS2
7-O-methylisomucronulatol	DRD1
7-O-methylisomucronulatol	KCNH2
7-O-methylisomucronulatol	ESR1
7-O-methylisomucronulatol	AR
7-O-methylisomucronulatol	SCN5A
7-O-methylisomucronulatol	PPARG
7-O-methylisomucronulatol	NOS3
7-O-methylisomucronulatol	HTR2A
7-O-methylisomucronulatol	SLC6A3
7-O-methylisomucronulatol	DPP4
7-O-methylisomucronulatol	GSK3B
7-O-methylisomucronulatol	HSP90AA1
7-O-methylisomucronulatol	CDK1
7-O-methylisomucronulatol	PRKACA
7-O-methylisomucronulatol	PIM1
7-O-methylisomucronulatol	NCOA1
berberine	PTGS2
berberine	KCNH2
berberine	ESR1
berberine	AR
berberine	SCN5A
berberine	NOS3
berberine	HSP90AA1
berberine	PRKACA
berberine	NCOA1
berberine	PDE10A
berberrubine	PTGS2
berberrubine	KCNH2
berberrubine	ESR1
berberrubine	AR
berberrubine	SCN5A
berberrubine	NOS3
berberrubine	PRKACA
berberrubine	NCOA1
epiberberine	KCNH2
epiberberine	ESR1
epiberberine	AR
epiberberine	PTGS2
epiberberine	NOS3
epiberberine	PRKACA
epiberberine	NCOA1
epiberberine	PDE10A
(R)-Canadine	PTGS2
(R)-Canadine	KCNH2
(R)-Canadine	SCN5A
(R)-Canadine	HTR3A
(R)-Canadine	HTR2A
(R)-Canadine	SLC6A3
(R)-Canadine	HSP90AA1
(R)-Canadine	PRKACA
(R)-Canadine	PDE10A
(R)-Canadine	DRD1
(R)-Canadine	DRD5
(R)-Canadine	KCNMA1
Berlambine	PTGS2
Berlambine	KCNH2
Berlambine	AR
Berlambine	SCN5A
Berlambine	NOS3
Berlambine	F7
Berlambine	HSP90AA1
Berlambine	PRKACA
Berlambine	NCOA1
Berlambine	KCNMA1
Corchoroside A_qt	NR3C2
Corchoroside A_qt	NCOA1
palmatine	PTGS2
palmatine	KCNH2
palmatine	ESR1
palmatine	AR
palmatine	SCN5A
palmatine	NOS3
palmatine	HSP90AA1
palmatine	PIM1
palmatine	NCOA1
palmatine	PRKACA
palmatine	CDK1
palmatine	F7
coptisine	PTGS2
coptisine	KCNH2
coptisine	ESR1
coptisine	AR
coptisine	SCN5A
coptisine	NOS3
Worenine	PTGS2
Worenine	ESR1
Worenine	AR
Worenine	PIM1
acacetin	TNF
acacetin	RELA
acacetin	PTGS2
acacetin	PIK3CA
acacetin	NCOA1
acacetin	ESR1
acacetin	PRKACA
acacetin	HSP90AA1
acacetin	DPP4
acacetin	CYP19A1
acacetin	CDKN1A
acacetin	CDK1
acacetin	BCL2
acacetin	BAX
acacetin	AR
luteolin	PTGS2
luteolin	AR
luteolin	HSP90AA1
luteolin	NCOA1
luteolin	PRKACA
luteolin	DPP4
luteolin	PIK3CA
luteolin	RELA
luteolin	EGFR
luteolin	AKT1
luteolin	TNF
luteolin	CCND1
luteolin	MCL1
luteolin	CDKN1A
luteolin	MMP9
luteolin	RBL2
luteolin	CDK4
luteolin	IL6R
luteolin	MDM2
luteolin	APP
luteolin	MMP1
luteolin	PCNA
luteolin	ERBB2
luteolin	PPARG
luteolin	HMOX1
luteolin	ICAM1
luteolin	BIRC5
luteolin	IFNG
luteolin	IL4R
luteolin	IRS1
luteolin	CD40LG
luteolin	NUF2
luteolin	ADCY5
Linarin	TOP2A
beta-sitosterol	PGR
beta-sitosterol	NCOA1
beta-sitosterol	PTGS2
beta-sitosterol	HSP90AA1
beta-sitosterol	PIK3CA
beta-sitosterol	KCNH2
beta-sitosterol	PRKACA
beta-sitosterol	DRD1
beta-sitosterol	SCN5A
beta-sitosterol	CHRNA2
beta-sitosterol	CHRNA7
beta-sitosterol	BCL2
beta-sitosterol	BAX
beta-sitosterol	COL1A2
beta-sitosterol	TGFB1
beta-sitosterol	PON1
Lucidumoside D_qt	ESR1
Lucidumoside D_qt	PTGS2
Lucidumoside D_qt	CA2
Lucidumoside D_qt	ACHE
Lucidumoside D_qt	DPP4
Lucidumoside D_qt	GSK3B
Lucidumoside D_qt	HSP90AA1
Lucidumoside D_qt	CDK1
Lucidumoside D_qt	NCOA1
taxifolin	PTGS2
taxifolin	HSP90AA1
taxifolin	PIK3CA
taxifolin	AKR1B1
taxifolin	RELA
taxifolin	ICAM1
taxifolin	DGAT2
taxifolin	APOB
eriodictyol	PTGS2
eriodictyol	HSP90AA1
eriodictyol	PRKACA
eriodictyol	NCOA1
eriodictyol	PIK3CA
eriodictyol	HMOX1
eriodictyol	NFE2L2
eriodictyol	NQO1
Olitoriside_qt	NR3C2
Methyl arachidonate	PTGS2
campest-5-en-3beta-ol	PGR
(2R)-5,7-dihydroxy-2-(4-hydroxyphenyl)chroman-4-one	PTGS2
(2R)-5,7-dihydroxy-2-(4-hydroxyphenyl)chroman-4-one	ESR1
(2R)-5,7-dihydroxy-2-(4-hydroxyphenyl)chroman-4-one	HSP90AA1
(2R)-5,7-dihydroxy-2-(4-hydroxyphenyl)chroman-4-one	PRKACA
(2R)-5,7-dihydroxy-2-(4-hydroxyphenyl)chroman-4-one	PGR
(2R)-5,7-dihydroxy-2-(4-hydroxyphenyl)chroman-4-one	NR3C2
(2R)-5,7-dihydroxy-2-(4-hydroxyphenyl)chroman-4-one	NR3C1
CLR	PGR
CLR	NR3C2
CLR	NCOA1
Stigmasterol	PGR
Stigmasterol	NR3C2
Stigmasterol	NCOA1
Stigmasterol	ADH1C
Stigmasterol	ESR1
Stigmasterol	PTGS2
Stigmasterol	ADRA2A
Stigmasterol	SLC6A3
Stigmasterol	AKR1B1
Stigmasterol	PLAUR
Stigmasterol	PRKACA
Stigmasterol	SCN5A
Stigmasterol	HTR2A
Stigmasterol	CHRNA7
beta-sitosterol	HTR2A
galeopsin	PTGS2
galeopsin	ADRA2A
galeopsin	ACHE
galeopsin	ADRA2B
galeopsin	SLC6A3
ZINC04073977	PGR
ZINC04073977	PTGS2
ZINC04073977	ADH1C
preleoheterin	PTGS2
preleoheterin	HSP90AA1
preleoheterin	PRKACA
iso-preleoheterin	PTGS2
arachidonic acid	PTGS2
arachidonic acid	RELA
arachidonic acid	CCND1
arachidonic acid	CDK4
arachidonic acid	HERC5
arachidonic acid	PPARG
arachidonic acid	H6PD
arachidonic acid	TNFRSF1A
arachidonic acid	TGFBR2
arachidonic acid	NOS3
arachidonic acid	ALOX5
arachidonic acid	PLA2G4A
arachidonic acid	PTEN
arachidonic acid	ALDH2
arachidonic acid	C1R
arachidonic acid	CETP
arachidonic acid	ABCG2
arachidonic acid	KCNQ1
arachidonic acid	TNFRSF1B
arachidonic acid	KCNJ11
